# Supplementary material for: TM9/Phg1 and SadA proteins control surface expression and stability of SibA adhesion molecules in Dictyostelium
Source: PubMed Central journal article supplement — Mol Biol Cell. 2012 Feb 15;23(4):679–86. doi: 10.1091/mbc.E11-04-0338 (PMC3279395; doi:10.1091/mbc.e11-04-0338), 2012-02-15
Supplement: supp_E11-04-0338_CombinedSupMats.pdf [file supp_E11-04-0338_CombinedSupMats.pdf]

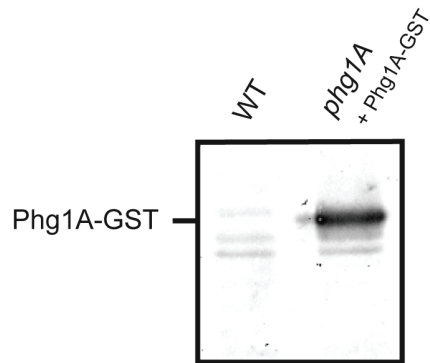

Supplementary figure 1. Phg1-GST can be biotinylated at the cell surface. Wild-type cells, or *phg1A* KO cells expressing a fusion protein of Phg1A with GST were submitted to a cell surface biotinylation, washed, and lysed. The Phg1A-GST fusion protein was purified by adsorption to glutathione beads, and migrated on a 9% SDS-polyacrylamide gel. After transfer to nitrocellulose, biotinylated Phg1a-GST was revealed with HRP-coupled avidin. The detection of biotinylated Phg1a-GST suggests that a fraction of this protein is present at the cell surface.
